# Supplementary material for: Ultra-Cheap Renewable Energy as an Enabling Technology for Deep Industrial Decarbonization via Capture and Utilization of Process CO2 Emissions
Source: MDPI journal article supplement (doi:10.3390/en15145181), 2022-07-17
Supplement: s1 [file s1]

Archive with 1 entries (1 files):
- energies-1762744-supplementary.pdf
